# Supplementary material for: An effective approach for the preparation of epoxy vitrimers by in situ formation of dynamic and permanent linkages in a one-pot curing reaction
Source: Royal Society of Chemistry journal article supplement (doi:10.1039/d3py00957b), 2023-01-01
Supplement: d3py00957b1.pdf [file d3py00957b1.pdf]

## Electronic supplementary information (ESI) for

### An effective approach of preparation of epoxy vitrimers through in situ formation of dynamic and permanent linkages in one-pot curing reaction

Du-Yuan Hung, Jia-Jun Lee, and Ying-Ling Liu\*

Department of Chemical Engineering, National Tsing Hua University, No. 101, Sec. 2, Kuang-Fu Road, Hsinchu 300044, Taiwan.

\* Corresponding author, E-mail: liuyl@mx.nthu.edu.tw

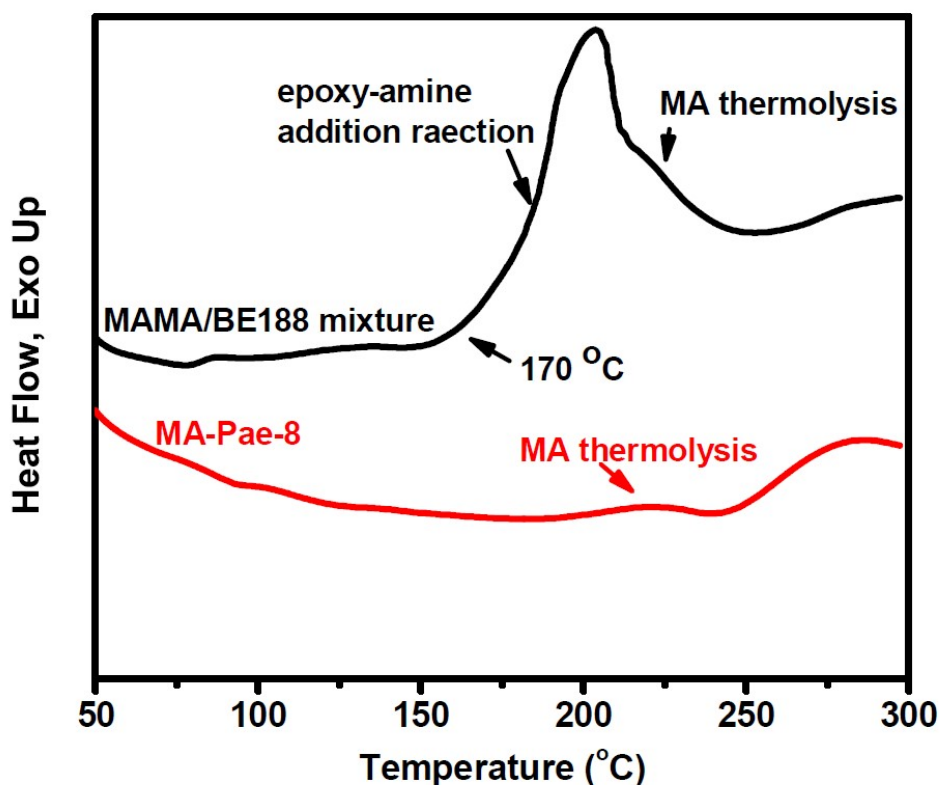

**Figure S1.** DSC thermograms of the MAMA/BE188 mixture and MA-Pae-8. The exothermic peaks are assigned to amine/epoxy addition reaction and MA thermolysis reaction. The disappearance of the signal of amine/epoxy addition reaction in MA-Pae-8 thermogram indicated the synthesis of MA-Pae-8 was majorly performed with the amine/epoxy addition reaction.

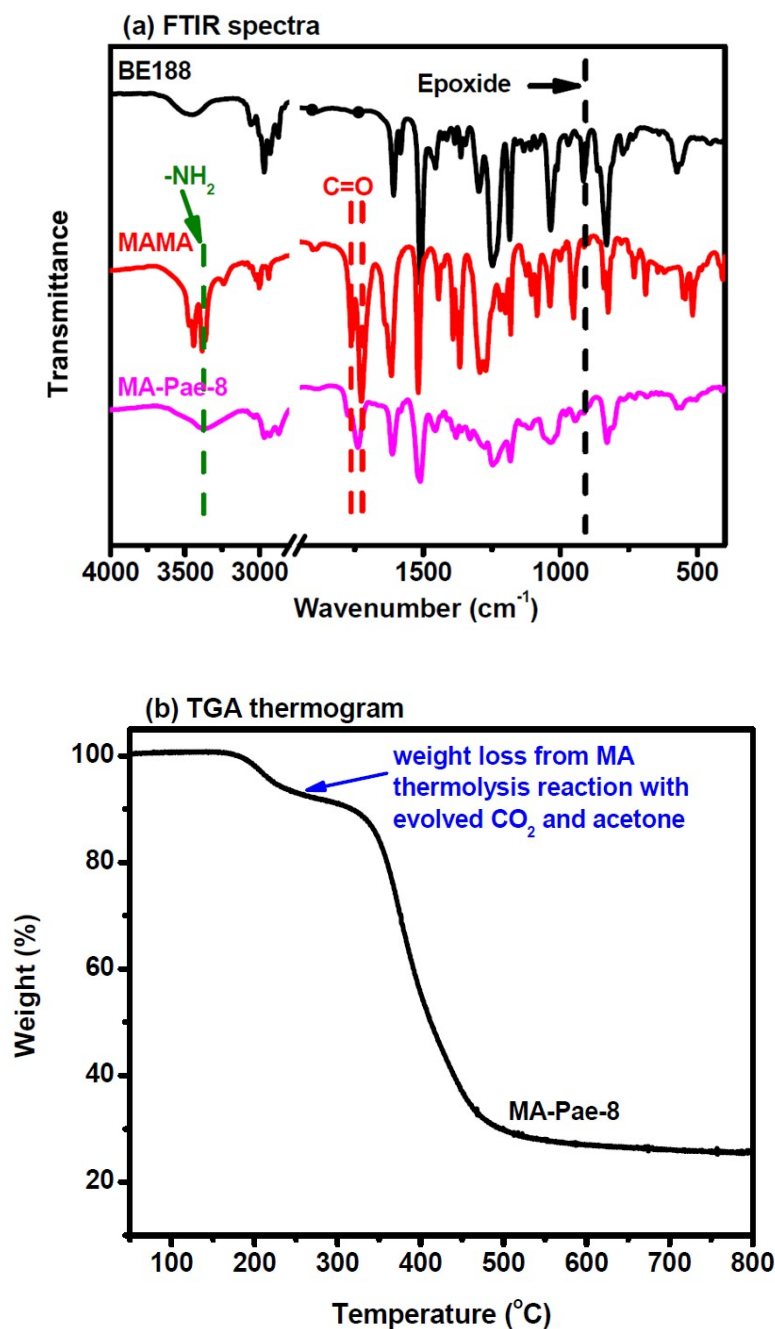

**Figure S2.** (a) FTIR spectra of MA-Pae-8. Compared to the raw materials, MA-Pae-8 did not exhibit the absorption peaks of amine and epoxy groups, indicating the 2 groups involved in the reactions for preparation of Ma-Pae-8. The absorptions of C=O groups found with MAMA was still observed with MA-Pae-8, supporting to it possessed MA groups. (b) TGA thermogram of MA-Pae-8. The weight loss at about 200-250 °C corresponded to the MA thermolysis with involves of CO<sub>2</sub> and acetone byproducts.

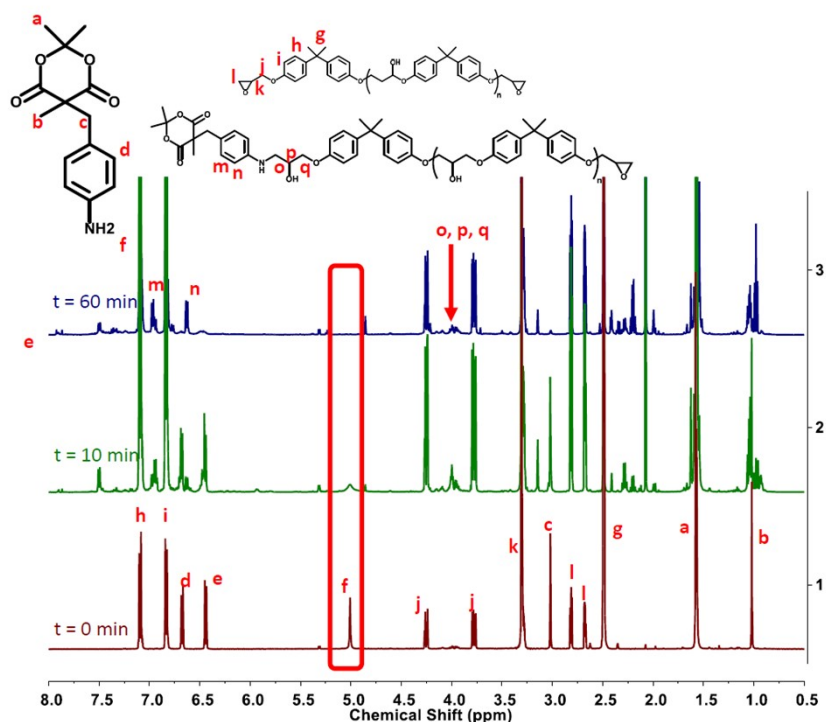

**Figure S3.**  $^1\text{H}$  NMR spectra of MAMA/BE188 mixture at 180 °C at different reaction time, for tracing the reaction between MAMA and BE188. Due to the poor solubility of the reaction product in the solvent ( $\text{DMSO-d}_6$ ), the spectra majorly showed the disappearance of the chemical groups (amine and epoxy) consumed in the reaction.

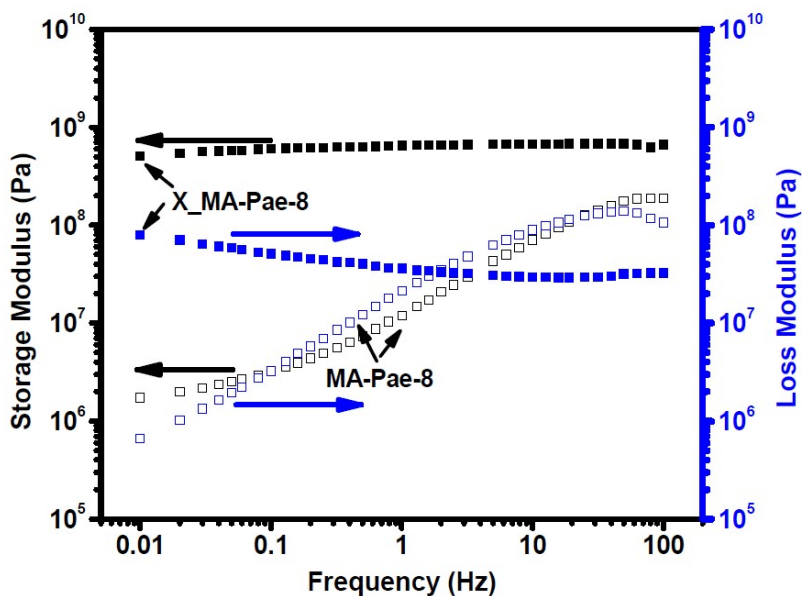

**Figure S4.** Storage modulus and loss modulus of MA-Pae-8 and its crosslinked analogue (X\_MA-Pae-8) recorded at 100 °C and various frequencies. The crosslinked structure of X\_MA-Pae-8 was supported with its frequency-independent modulus in

the test.

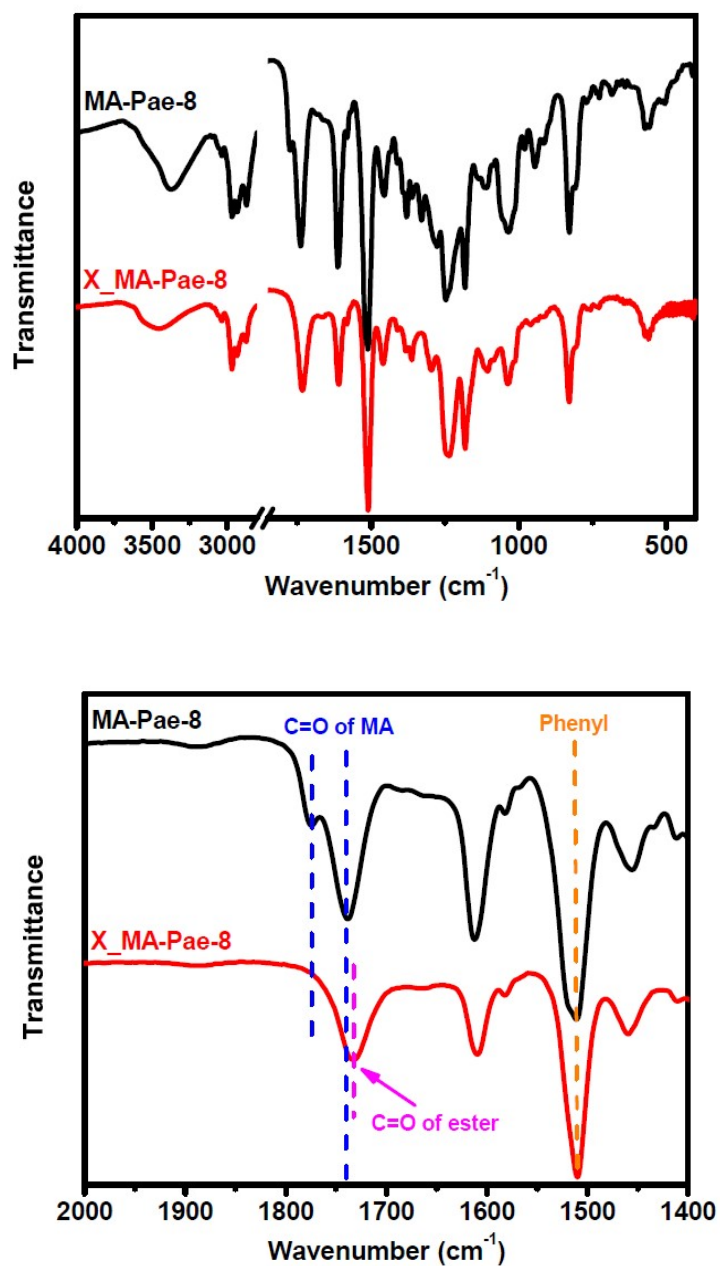

**Figure S5.** FTIR spectra of MA-Pae-8 and the corresponding thermally crosslinked X\_MA-Pae-8. The conversion of MA to ester groups through ketene/-OH addition reaction is characterized with the disappearance of MA absorption at 1738 and 1775  $\text{cm}^{-1}$  and the appearance of ester linkages at 1733  $\text{cm}^{-1}$ . With the absorption of phenyl group at 1510  $\text{cm}^{-1}$  as an internal standard, the conversion of MA to ester groups in the curing reaction is calculated to be above 95 %.

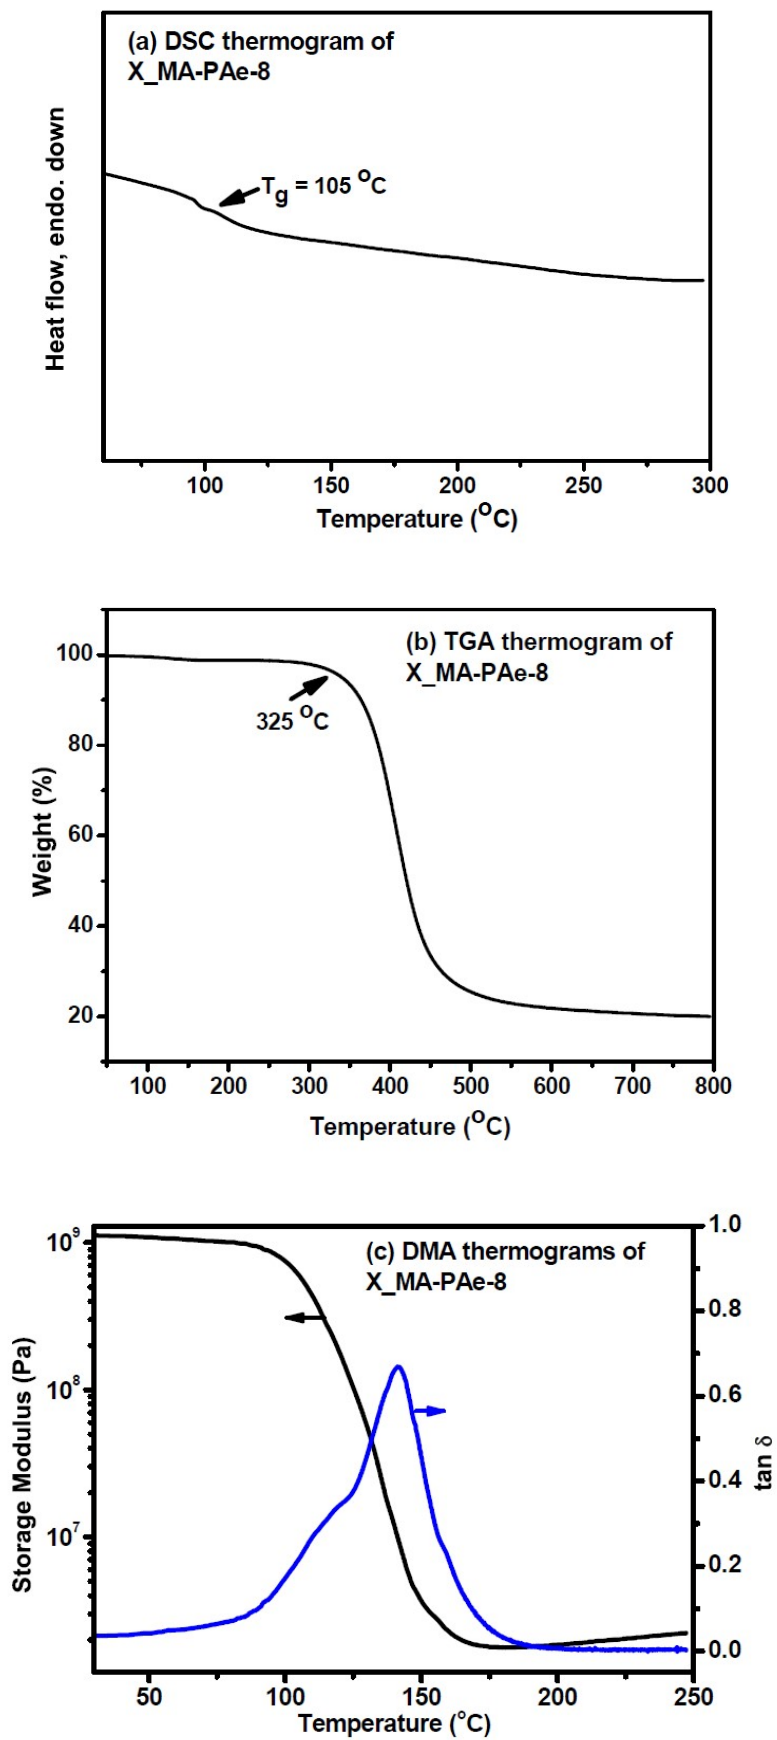

**Figure S6.** (a) DSC, (b) TGA, and (c) DMA thermograms of X\_MA-Pae-8.

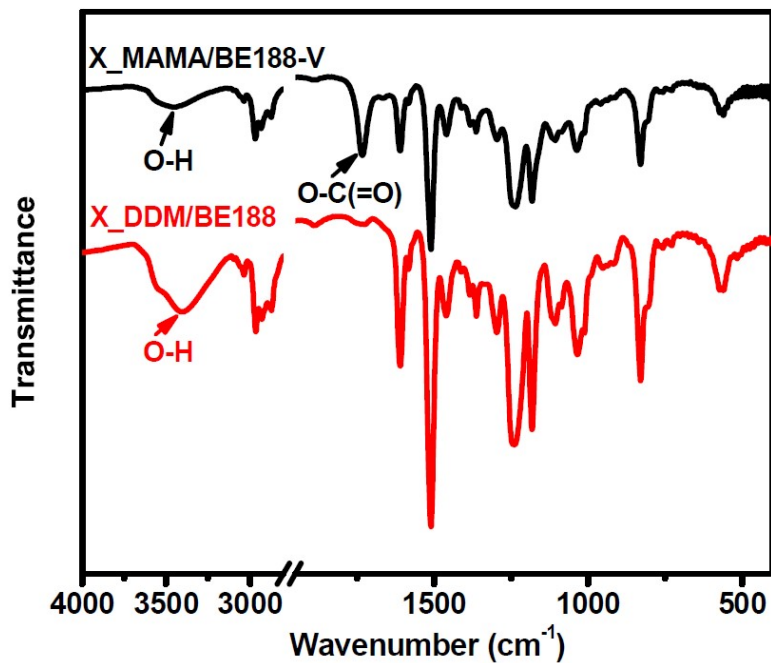

**Figure S7.** FTIR spectra of crosslinked epoxy resins: X\_MAMA/BE188-V and X\_DDM/BE188.

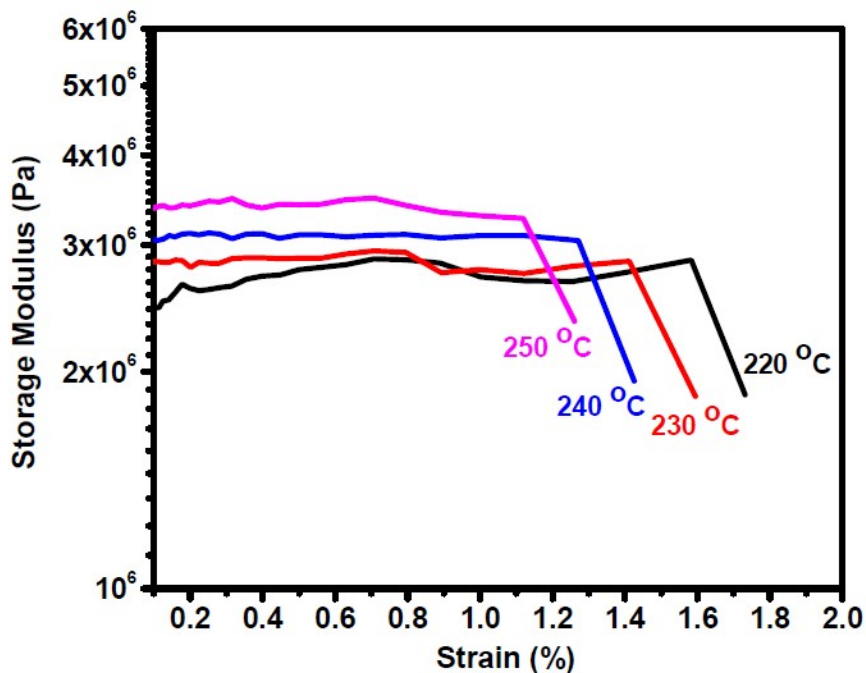

**Figure S8.** Strain sweep experimental curves recorded on X\_MAMA/BE188-V with a constant frequency of 1 Hz at 220 - 250 °C.

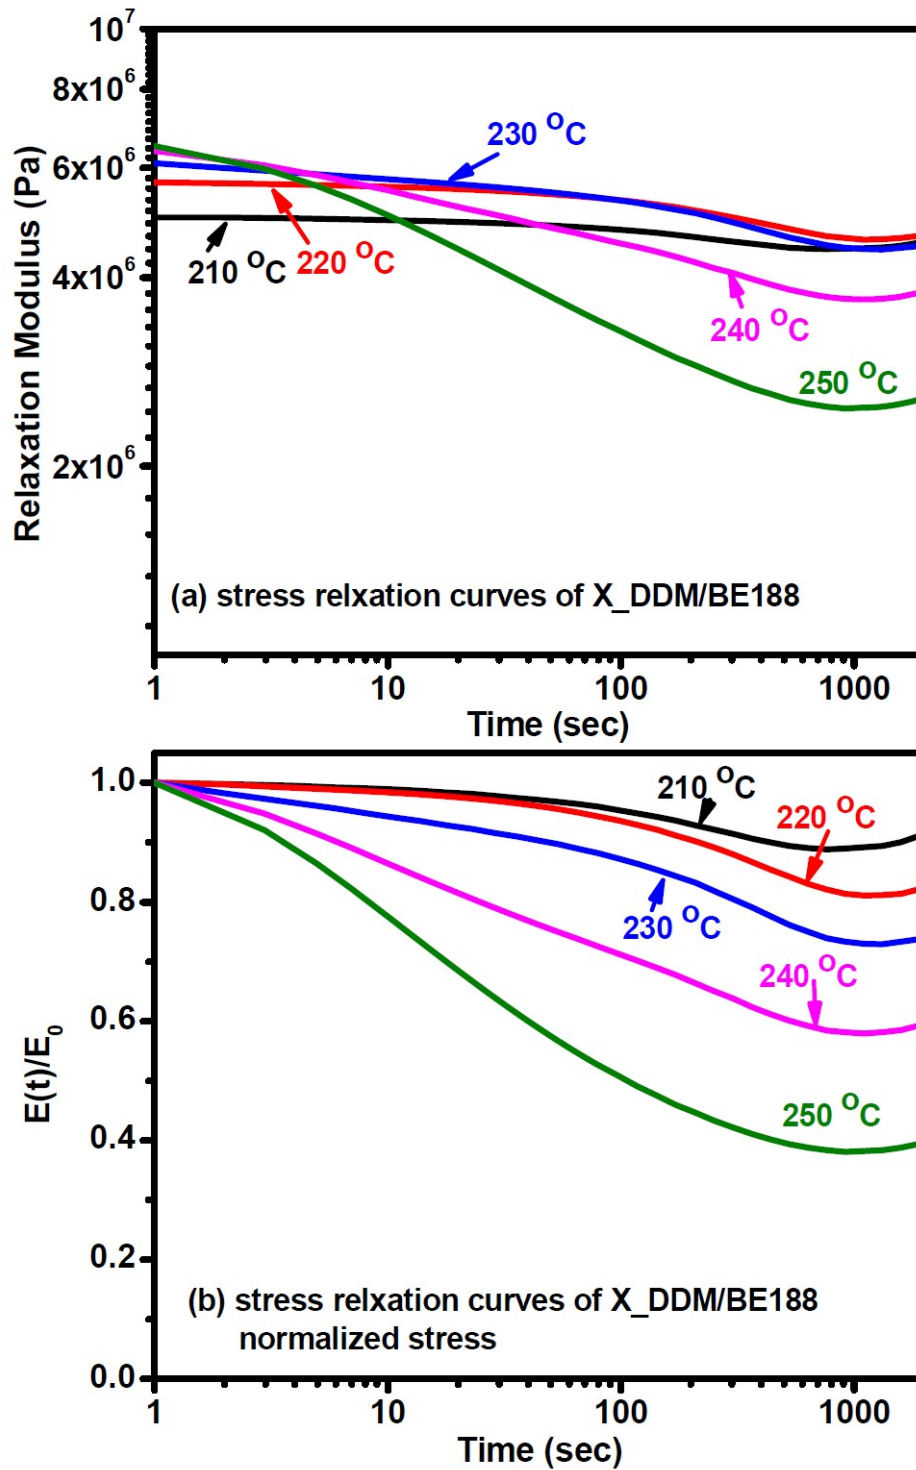

**Figure S9.** (a) Stress-relaxation tests on X\_DDM/BE188 with a constant strain of 1.0 % at 210-250 °C. (b) Plots of the stress relaxation behaviors in term of normalized stress with relaxation time.

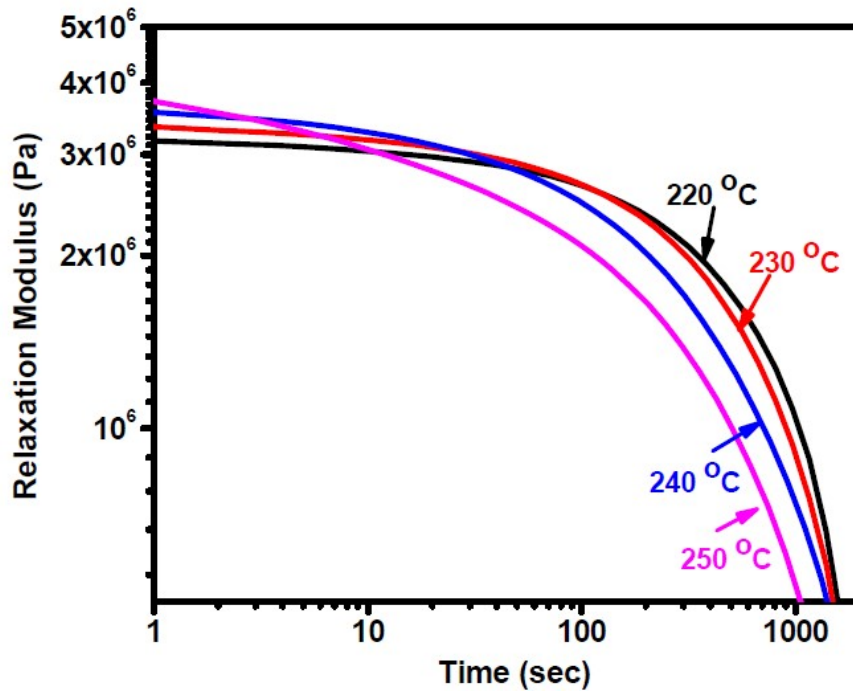

**Figure S10.** Stress-relaxation tests on X\_MAMA/BE188-V with a constant strain of 1.0 % at 220-250 °C.

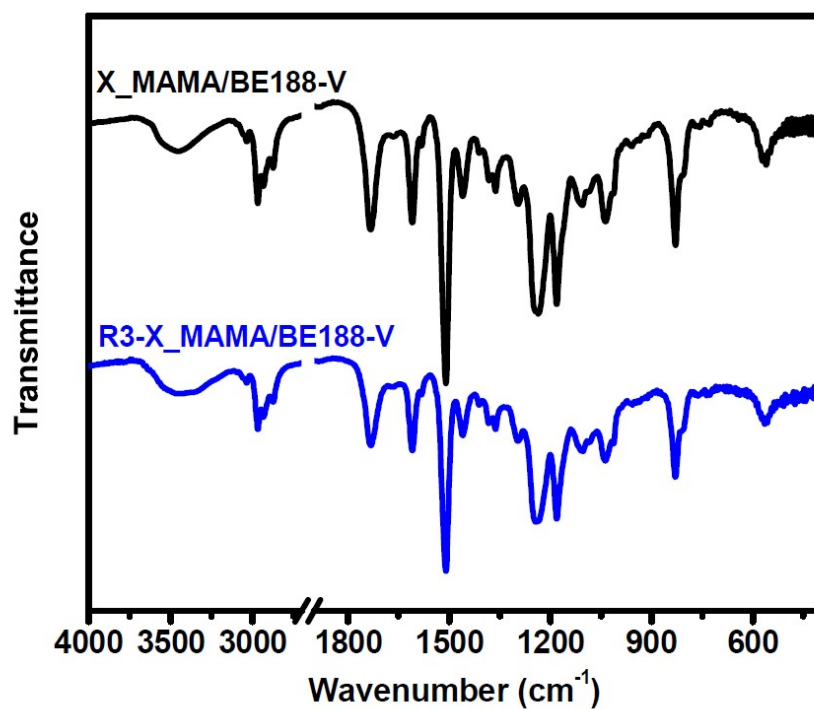

**Figure S11.** FTIR spectra of X\_MAMA/Be188-V and its 3<sup>rd</sup>-recycled sample (R3\_MAMA/BE188-V). The 2 samples did not show obvious and significant differences in the spectra, indicating the recycle and reprocess operation did not bring thermal degradation and chemical changes to X\_MAMA/BE188-V.



**Table S1.** Gel fractions (%) of X\_MAMA/BE188-V and the thermally recycled samples. The data recorded on X\_DDM/BE188 is included for a comparison.

| Sample          | Gel fraction (wt%) |              |                                     |                                      |
|-----------------|--------------------|--------------|-------------------------------------|--------------------------------------|
|                 | NMP at 30 °C       | NMP at 80 °C | 1 N HCl <sub>(aq)</sub><br>at 30 °C | 1 N NaOH <sub>(aq)</sub><br>at 30 °C |
| X_DDM/BE188     | 95.0               | 90.3         | 95.2                                | 91.3                                 |
| X_MAMA/BE188-V  | 96.8               | 93.0         | 94.2                                | 86.3                                 |
| R1_MAMA/BE188-V | 96.5               | 92.1         | 98.1                                | 95.2                                 |
| R2_MAMA/BE188-V | 96.4               | 92.0         | 97.8                                | 94.9                                 |
| R3_MAMA/BE188-V | 96.6               | 92.3         | 97.9                                | 95.0                                 |
